# Supplementary material
Source: Springer Nature journal article supplement (http://www.nature.com/msb/journal/v2/n1/extref/msb4100071-s8.pdf)
Supplement: msb4100071-s8.pdf [file msb4100071-s8.pdf]

**Table 4.** Maximum velocity of fluxes ( $\mu \text{ mol g wet wt}^{-1} \text{ min}^{-1}$ ) (Salem et al., 2002)

| Vmax                                        | Value |
|---------------------------------------------|-------|
| Gluc->GP                                    | 5.90  |
| $\text{O}_2 \rightarrow \text{H}_2\text{O}$ | 67.6  |

## References

Salem JE, Saidel GM, Stanley WC, Cabrera ME (2002) Mechanistic model of myocardial energy metabolism under normal and ischemic conditions. *Ann Biomed Eng* **30**: 202-216

$\alpha$  (represents the normal velocity of ATP consumption) =  $34.9 (\mu \text{ mol g wet wt}^{-1} \text{ min}^{-1})$  (Salem et al., 2002)

## References

Salem JE, Saidel GM, Stanley WC, Cabrera ME (2002) Mechanistic model of myocardial energy metabolism under normal and ischemic conditions. *Ann Biomed Eng* **30**: 202-216
